# Supplementary material
Source: publisher site journal article supplement (https://www.spandidos-publications.com/6354/downloadSupplementary)
Supplement: Supplementary file 1 [file downloadSupplementary]

## Sheet: Sheet1
Table SII: Clicnial information of 6 patients with urosepsis
Number	Sex	Age	BMI	WBC	PLT	Total Bilirubin	Scr	Albumin	Lactate	qSOFA	SOFA	CRP	PCT	TNF-a	IL-1	IL-6	IL-8	Time in hospital
1	Male	79	25.09	35.35	14	15.4	373	35.6	1.3	3	14	274.11	100	8.74	5	55.6	14.3	28
2	Male	70	24.48	16.6	27	66.7	308	36.2	5.4	3	15	300.75	48.75	6.19	5	3.49	13	6
3	Male	65	26.98	9.31	192	10	161	32.7	1	3	10	233.33	3.94	79.1	5.4	137	106	28
4	Female	62	24.21	17.65	134	17.3	155	28.9	1.6	1	4	272.62	28.96	46.9	10.5	1000	242	4
5	Female	50	32.05	21.38	157	49.1	145	30.1	2.7	3	10	243.55	84.39	15.2	5	40.3	107	28
6	Female	78	23.43	3.65	97	9.4	127	33.4	1.1	0	2	38.93	7.79	118	13.2	1000	280	10
